# Supplementary material for: Divergent historical GPP trends among state-of-the-art multi-model simulations and satellite-based products
Source: Copernicus journal article supplement (doi:10.5194/esd-2021-69), 2021-09-23
Supplement: Supplementary file [file esd-2021-69-AC1-supplement.pdf]

# Correction figure 4 for "Divergent historical GPP trends among state-of-the-art multi-model simulations and satellite-based products"

Ruqi Yang et al.,

- 5 The fourth figure in the manuscript (Fig. 4) calculated the global GPP trend from 2001 to 2015 and should be placed in the supplement (Fig. S7), but I put it in the article by mistake. Figure 4 should be the GPP trend from 1982-2015, which is presented here.

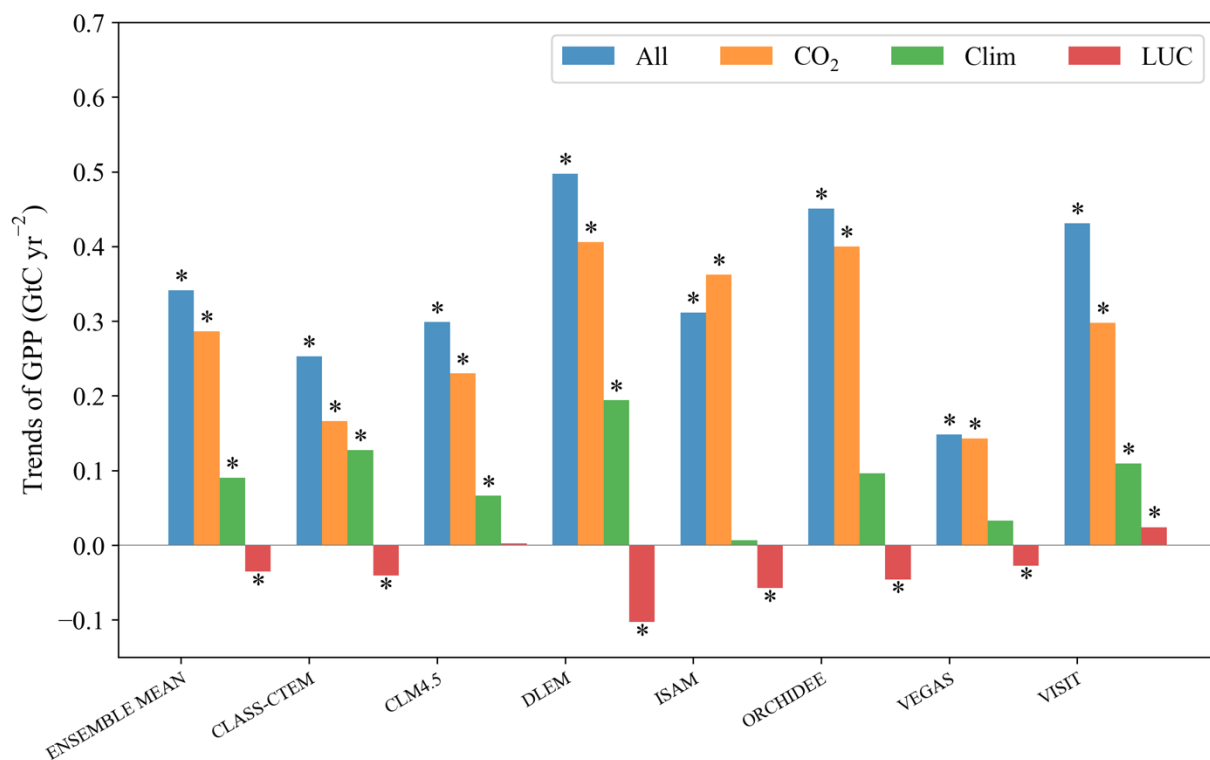

10 **Figure 4. Attributions of global total GPP trends for TRENDYv6 simulations from 1982 to 2015: CO<sub>2</sub> fertilization effect (S1), climate (S2-S1), and land-use change (S3-S2). "All" gives the values of the reference simulation that includes the effect of all three drivers (S3). Asterisks indicate that the trend is significant with  $p < 0.05$  following the non-parametric Mann-Kendall trend test.**
